# Supplementary material for: Chitosan/PVA-supported silver nanoparticles for azo dyes removal: fabrication, characterization, and assessment of antioxidant activity
Source: Royal Society of Chemistry journal article supplement (doi:10.1039/d3va00224a), 2023-11-22
Supplement: d3va00224a1.pdf [file d3va00224a1.pdf]

## **Chitosan/PVA Supported Silver Nanoparticles for Azo Dyes Removal: Fabrication, Characterization, and Assessment of Antioxidant Activity**

Ismet Meydan<sup>1\*</sup>, Aysenur Aygun<sup>2</sup>, Rima Nour Elhouda Tiri<sup>2</sup>, Tugba Gur<sup>1</sup>, Yılmaz Kocak<sup>3</sup>, Hamdullah Seckin<sup>1</sup>, Fatih Sen<sup>1\*</sup>

<sup>1</sup>*Van Vocational School of Health Services, Van Yüzüncü Yıl University, Zeve Campus, 65080 Van, Turkiye*

<sup>2</sup>*Sen Research Group, Department of Biochemistry, Dumlupınar University, 43000 Kutahya, Turkey*

<sup>3</sup>*Physical Therapy and Rehabilitation, Faculty of Health Sciences, Van Yuzuncu Yil University, 65080 Van, Turkey*

**\*Corresponding Author:** [ismetmeydan@yyu.edu.tr](mailto:ismetmeydan@yyu.edu.tr), [fatihsen1980@gmail.com](mailto:fatihsen1980@gmail.com)

### **Support information**

#### **Chemicals**

AgNO<sub>3</sub> (≥99), Chitosan (low molecular weight), Poly (Vinyl Alcohol) (PVA, ≥ 99+%), Methylene blue, Methylene orange, Methylene red, safranin, crystal violet, and all other chemicals were supplied from Sigma Aldrich.

#### **Analysis of AgNPs@Chitosan/PVA Nanocomposite**

UV-Vis absorption spectra were measured in the PerkinElmer Lambda 750 instrument in the scanning range of 200-800 nm. TEM analysis was performed using a JEOL JEM 100 kV transmission electron microscope. XRD analysis was performed using the Rigaku MINIFLEX 600 X instrument. PerkinElmer FTIR spectrum was used to find biomolecules involved in green synthesis.

#### **DPPH test**

The antioxidant activity of AgNPs@Chitosan/PVA nanocomposite was determined using the 250 µL of DPPH solution was added to 3 mL of nanocomposite solution at different concentrations (5, 25, 50, and 100 µg/mL). Ascorbic acid was used as a positive control in the DPPH study. DPPH was used as a negative control. Antiradical activity, expressed as percent inhibition (%) of the DPPH radical, was calculated by determining the decrease in absorbance upon the addition of test samples.

The DPPH radical scavenging activity was determined according to equation (2):

$$\text{DPPH scavenging percentage (\%)} = (A_c - A_t) / A_c \times 100 \quad (2)$$

where  $A_c$  and  $A_t$  are the absorbance of the control and test samples, respectively (after 30 minutes, at 517 nm).

### **H<sub>2</sub>O<sub>2</sub> antioxidant test**

Antioxidant activity was determined by H<sub>2</sub>O<sub>2</sub> free radical scavenging assay using the Pick and Mizel method. 100  $\mu$ L of H<sub>2</sub>O<sub>2</sub> solution (5 mM) was added to different concentrations (5, 25, 50, and 100  $\mu$ g/mL) of AgNPs@Chitosan/PVA nanocomposite and absorbance was read at 230 nm after 20 minutes of incubation [33]. Ascorbic acid was used as a positive control. H<sub>2</sub>O<sub>2</sub> was used as a negative control. The following equation was used to determine the H<sub>2</sub>O<sub>2</sub> radical scavenging ability (2):

$$\text{H}_2\text{O}_2 \text{ scavenging percentage (\%)} = (A_c - A_t) / A_c \times 100 \quad (2)$$
